# Supplementary material
Source: Frontiers journal article supplement (https://www.frontiersin.org/articles/428894)
Supplement: Data_Sheet_1.PDF [file Data_Sheet_1.PDF]

## Supplementary materials

**Figure S1**

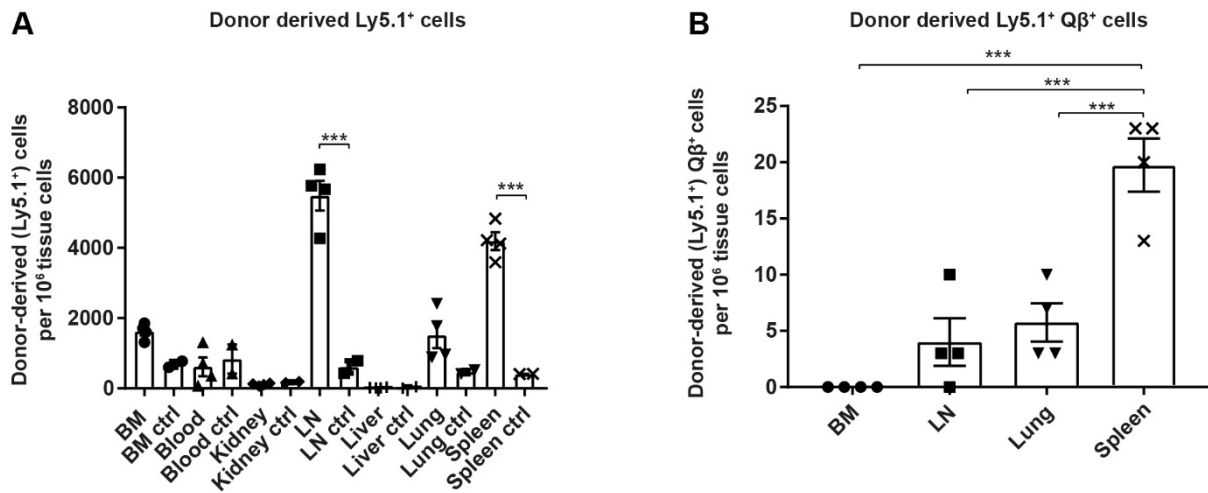

**Figure S1: Tissue distribution of Ly5.1<sup>+</sup> cells after transfer.** Unpurified cells from Q $\beta$  immune Ly5.1 mice were transferred to allotypic (Ly5.2) hosts and their tissue distribution was analysed 4 days after the transfer. **(A)** The number of donor-derived (Ly5.1<sup>+</sup>) cells in the BM, blood, kidney, lymph nodes (LN), liver, lung and spleen was quantified by FCM. Naïve Ly5.2 mice served as controls (ctrl). **(B)** The number of Q $\beta$  VLP-specific donor-derived cells was quantified in the BM, LN, lung and spleen at day 4 after the transfer. Mean with SEM. P values were obtained using a one-way ANOVA followed by Sidak's multiple comparisons test comparing all groups to the respective control. \*\*\*  $p < 0.001$   $n = 4$  mice per group and 2 naïve controls. Data representative of 1 experiment.

## Figure S2

### A Viability of Q $\beta$ specific CS B cells in spleen, d6 p. i.

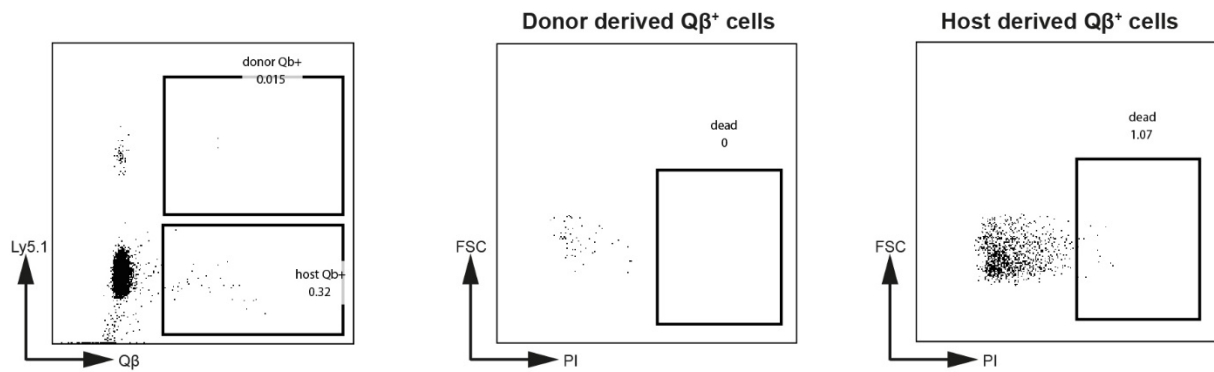

### B Viability of Q $\beta$ specific PCs in spleen, d6 p. i.

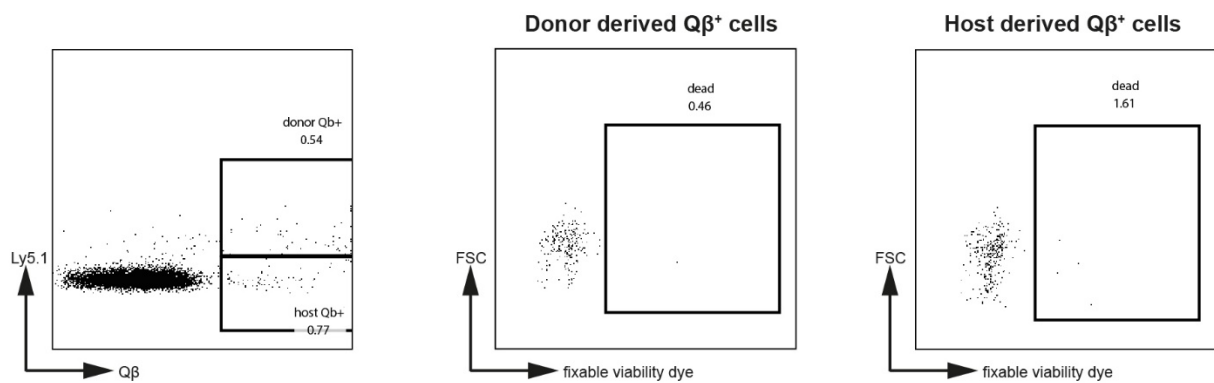

**Figure S2: Viability of Q $\beta$ -specific CS B cells and PCs.** Congenic mice (Ly5.1) were immunized with 50  $\mu$ g Q $\beta$  VLPs i.v.. Eight weeks after immunization spleens of immunized and naïve mice were isolated and PNA<sup>-</sup> B220<sup>+</sup> MACS purified cells were transferred into host mice (Ly5.2). Recipient mice were immunized with 50  $\mu$ g Q $\beta$  VLPs i.v. one day after the transfer. The viability of Q $\beta$ <sup>+</sup> CS B cells and PCs in the spleen was assessed 6 days after challenge. **(A)** Representative FCM plots of B220<sup>+</sup> cells not expressing IgM, IgD, CD4, CD8, CD11b, CD11c or GR1 and binding labelled Q $\beta$  VLPs. The congenic Ly5 marker was used to discriminate transfer from host derived CS B cells. Dead cells amongst donor and host derived Q $\beta$ -specific CS B cells were identified using propidium iodide (PI). **(B)** Representative FCM plots of B220<sup>low</sup> cells not expressing IgM, IgD, CD4, CD8, CD11b, CD11c or GR1 and binding labelled Q $\beta$  VLPs intracellularly after permeabilisation. The congenic Ly5 marker was used to discriminate transfer from host derived PCs cells. Dead cells amongst donor and host derived Q $\beta$ -specific PCs were stained using a fixable viability dye.
